# Supplementary material
Source: publisher figshare collection journal article supplement (https://springernature.figshare.com/ndownloader/files/17484404)
Supplement: Supplementary file [file 17484404]

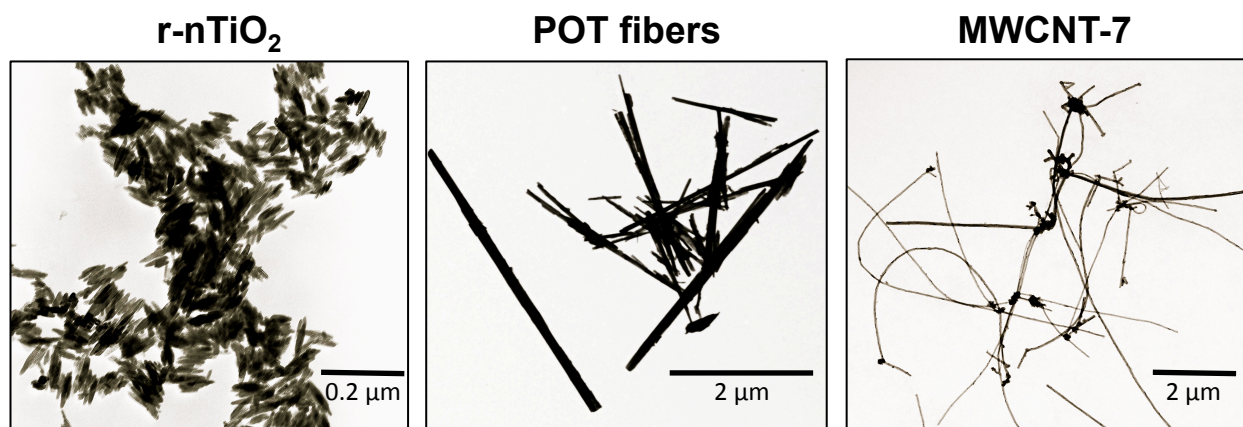

**Figure S1** TEM images of r-nTiO<sub>2</sub>, POT fibers, and MWCNT-7.

Figure S1 is based on Supplementary Figure S2 in Supplementary Doc S2 in Abdelgied et al, 2019 [11]: Creative Commons Attribution 4.0 International License (<http://creativecommons.org/licenses/by/4.0/>).

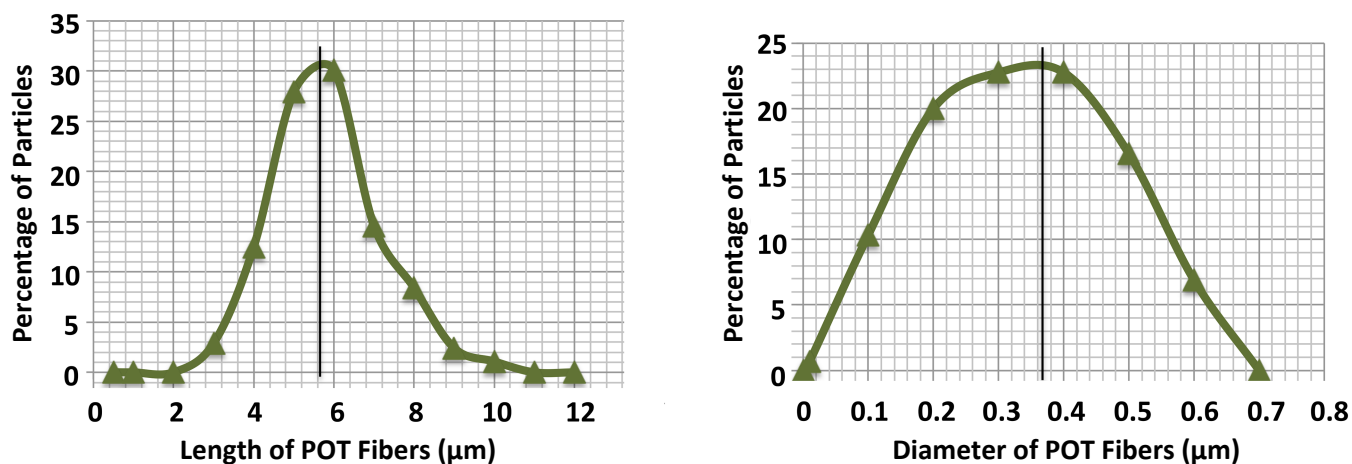

**Figure S2** Lengths and diameters of the POT fibers used in this study.

Figure S2 is derived from Supplementary Figure S1 in Abdelgied et al, 2018 [12]: Creative Commons Attribution 4.0 International License (<http://creativecommons.org/licenses/by/4.0/>).
